# Supplementary material
Source: PubMed Central journal article supplement (PMC4544717)
Supplement: NIHMS693418-supplement-01.pdf [file NIHMS693418-supplement-01.pdf]

## Renal Function and Long-term Decline in Cognitive Function: The Baltimore Longitudinal Study of Aging

Supplementary Table 1. Number of administrations of each neurocognitive test

| Test                            | N    | Median No. of   |     |     | N(%) with $\geq 2$ test administrations |
|---------------------------------|------|-----------------|-----|-----|-----------------------------------------|
|                                 |      | Administrations | Min | Max |                                         |
| Benton Visual Retention Test    | 2116 | 5               | 1   | 10  | 1030 (48.7%)                            |
| Digit Span Test                 | 1082 | 4               | 1   | 7   | 578 (53.4%)                             |
| California Verbal Learning Test | 1017 | 4               | 1   | 7   | 550 (54.1%)                             |
| Letter & Category Fluency       | 748  | 4               | 1   | 7   | 415 (55.2%)                             |
| Trail Making Test               | 744  | 4               | 1   | 7   | 411 (55.2%)                             |
| Boston Naming Test              | 649  | 4               | 1   | 7   | 387 (59.6%)                             |



Supplemental Table 2. Coefficients from mixed-effects regression models relating change in 1/Scr with change in cognitive function, adjusting for creatinine assay type.

|                               | Test Score                          | Age      | Age*1/Scr <sup>1</sup> | Age*Sex*1/Scr <sup>2</sup> |
|-------------------------------|-------------------------------------|----------|------------------------|----------------------------|
| Benton Visual Retention Test  | # errors                            | 1.612**  | -0.511**               | -0.165**                   |
| Boston Naming Test            | # correct                           | -1.298   | 0.476                  |                            |
| CVLT Learning Slope           | Mean # of<br>new words<br>per trial | -0.169** | 0.108*                 |                            |
| CVLT Free recall, short delay | # correct                           | -1.203** | 0.348                  |                            |
| CVLT Free recall, long delay  | # correct                           | -1.160** | 0.431                  |                            |
| Digit Span Test, forward      | # correct                           | -0.248   | -0.020                 |                            |
| Digit Span Test, backward     | # correct                           | -0.251   | -0.033                 |                            |
| Category Fluency              | # correct                           | -1.783** | 0.275                  |                            |
| Letter Fluency                | # correct                           | -0.712   | 0.188                  |                            |
| Trail-Making Test, Part A     | Time to<br>completion               | 6.299*   | 0.986                  |                            |
| Trail-Making Test, Part B     | Time to<br>completion               | 19.693*  | 6.679                  |                            |

\* p<.05; \*\* p<.01; CVLT = California Verbal Learning Test; SCr = Serum creatinine concentration. -

1. Test of the association of 1/SCr with change in score on cognitive test.
2. Test of the interaction between 1/SCr and sex on change in cognitive test score; where blank, no significant (p<.05) interaction detected.

Supplemental Table 3. Coefficients from mixed-effects regression models relating change in 1/Scr with change in cognitive function, excluding those with CVD and initial eGFR<60 cc/min/1.73m<sup>2</sup>

|                               | Test Score                          | Age      | Age*1/SCr <sup>1</sup> | Age*Sex*1/Scr <sup>2</sup> |
|-------------------------------|-------------------------------------|----------|------------------------|----------------------------|
| Benton Visual Retention Test  | # errors                            | 1.550**  | -0.475**               | -0.172**                   |
| Boston Naming Test            | # correct                           | -1.092   | 0.374                  |                            |
| CVLT Learning Slope           | Mean # of<br>new words<br>per trial | -0.163** | 0.109*                 |                            |
| CVLT Free recall, short delay | # correct                           | -1.204** | 0.309                  |                            |
| CVLT Free recall, long delay  | # correct                           | -1.243** | 0.431                  |                            |
| Digit Span Test, forward      | # correct                           | -0.232   | -0.028                 |                            |
| Digit Span Test, backward     | # correct                           | -0.283   | -0.014                 |                            |
| Category Fluency              | # correct                           | -1.916** | 0.430                  |                            |
| Letter Fluency                | # correct                           | 0.163    | -0.433                 |                            |
| Trail-Making Test, Part A     | Time to<br>completion               | 3.88     | 2.17                   |                            |
| Trail-Making Test, Part B     | Time to<br>completion               | 24.3*    | 2.35                   | -8.95*                     |

\* p<.05; \*\* p<.01; CVLT = California Verbal Learning Test; SCr = Serum creatinine concentration. -

1. Test of the association of 1/SCr with change in score on cognitive test.
2. Test of the interaction between 1/SCr and sex on change in cognitive test score; where blank, no significant (p<.05) interaction detected.
